# Supplementary material for: Utilization, Patient Characteristics, and Longitudinal Improvements among Patients from a Provincially Funded Transdiagnostic Internet-delivered Cognitive Behavioural Therapy Program: Observational Study of Trends over 6 Years
Source: PubMed Central journal article supplement — Can J Psychiatry. 2021 Apr 12;67(3):192–206. doi: 10.1177/07067437211006873 (PMC8935601; doi:10.1177/07067437211006873), 2021-04-12
Supplement: sj-pdf-1-cpa-10.1177_07067437211006873.pdf [file sj-pdf-1-cpa-10.1177_07067437211006873.pdf]

Table 1. Demographic characteristics by trial periods, nontrial period, and overall for patients who started the Wellbeing Course

|                                                                           | <b>Trial 1<br/>(Nov 2013 -<br/>Jul 2015)</b>                                                                                | <b>Trial 2<br/>(Feb 2016<br/>- Jul 2016)</b>                  | <b>Trial 3<br/>(Dec 2016 -<br/>Jun 2017)</b>                                                               | <b>Trial 4<br/>(Oct 2017 -<br/>Sep 2018)</b>                  | <b>Trial 5<br/>(Sep 2018 -<br/>Mar 2019)</b>                                                        | <b>Trial 6<br/>(May 2019 -<br/>Nov 2019)</b>                                                                 | <b>Non-trial</b>                                | <b>TOTAL</b>                                     | <b>Significance</b>                                  |
|---------------------------------------------------------------------------|-----------------------------------------------------------------------------------------------------------------------------|---------------------------------------------------------------|------------------------------------------------------------------------------------------------------------|---------------------------------------------------------------|-----------------------------------------------------------------------------------------------------|--------------------------------------------------------------------------------------------------------------|-------------------------------------------------|--------------------------------------------------|------------------------------------------------------|
| Comparison                                                                | Cohort<br>Comparison:<br>once-weekly<br>support by<br>specialized<br>therapists<br>vs.<br>non-<br>specialized<br>therapists | RCT:<br>optional<br>support vs.<br>once-<br>weekly<br>support | Preference<br>Trial:<br>patients<br>select<br>preference<br>for optional<br>vs. once-<br>weekly<br>support | RCT:<br>once-weekly<br>vs.<br>one-<br>business-day<br>support | RCT:<br>once-weekly<br>support<br>with/without<br>pre-<br>treatment<br>motivational<br>interviewing | Factorial<br>RCT:<br>once-weekly<br>vs. twice-<br>weekly<br>support<br>&<br>Homework<br>reflection or<br>Not | Standard<br>Practice:<br>once-weekly<br>support |                                                  |                                                      |
| Patients<br>started<br>course ( <i>n</i> )                                | 462                                                                                                                         | 173                                                           | 373                                                                                                        | 675                                                           | 433                                                                                                 | 593                                                                                                          | 1294                                            | 4003                                             |                                                      |
| <b>Age</b>                                                                |                                                                                                                             |                                                               |                                                                                                            |                                                               |                                                                                                     |                                                                                                              |                                                 |                                                  |                                                      |
| Mean age<br>(SD)<br>[Age range]                                           | 39.07<br>(12.72)<br>[18-74]                                                                                                 | 38.34<br>(12.94)<br>[19-76]                                   | 37.38<br>(12.93)<br>[18-86]                                                                                | 36.92<br>(13.02)<br>[18-84]                                   | 37.72<br>(12.88)<br>[18-76]                                                                         | 36.84<br>(13.04)<br>[18-88]                                                                                  | 37.11<br>(12.79)<br>[18-81]                     | <b>37.42</b><br><b>(12.89)</b><br><b>[18-88]</b> | $F_{(7,4000)} =$<br>$1.92, p =$<br>$.08$             |
| <b>Gender</b>                                                             |                                                                                                                             |                                                               |                                                                                                            |                                                               |                                                                                                     |                                                                                                              |                                                 |                                                  |                                                      |
| Men                                                                       | 24.9%<br>(115/461)                                                                                                          | 21.4%<br>(37/173)                                             | 23.3%<br>(87/373)                                                                                          | 24.0%<br>(162<br>/675)                                        | 25.2%<br>(109/433)                                                                                  | 26.3%<br>(156/593)                                                                                           | 26.8%<br>(347/1293)                             | <b>25.3%</b><br><b>(1013/4001)</b>               |                                                      |
| Women                                                                     | 74.6%<br>(344/461)                                                                                                          | 78.6%<br>(136/173)                                            | 75.9%<br>(283/373)                                                                                         | 76.0%<br>(513/675)                                            | 74.8%<br>(324/433)                                                                                  | 71.8%<br>(426/593)                                                                                           | 72.8 %<br>(941/1293)                            | <b>74.2%</b><br><b>(2967/4001)</b>               | $\chi^2_{(3, N = 4001)}$<br>$= 52.23, p =$<br>$.007$ |
| Non-binary,<br>two-spirit,<br>not listed, or<br>prefer not to<br>disclose | 0.4%<br>(2/461)                                                                                                             | 0                                                             | 0.8%<br>(3/373)                                                                                            | 0                                                             | 0                                                                                                   | 1.9%<br>(11/593)                                                                                             | 3.9%<br>(5/1293)                                | <b>0.4%</b><br><b>(21/4001)</b>                  |                                                      |
| <b>Location</b>                                                           |                                                                                                                             |                                                               |                                                                                                            |                                                               |                                                                                                     |                                                                                                              |                                                 |                                                  |                                                      |

|                                       |                    |                    |                    |                    |                    |                    |                      |                                    |                                            |
|---------------------------------------|--------------------|--------------------|--------------------|--------------------|--------------------|--------------------|----------------------|------------------------------------|--------------------------------------------|
| Large city<br>(>200,000)              | 50.3%<br>(232/461) | 45.7%<br>(79/173)  | 40.2%<br>(150/373) | 40.6%<br>(274/675) | 42.5%<br>(184/433) | 44.9%<br>(266/592) | 44.7%<br>(579/1293)  | <b>44.1%</b><br><b>(1763/3999)</b> | $\chi^2_{(24, N = 3999)} = 42.55, p = .01$ |
| Small-medium city<br>(10,000-200,000) | 20.4%<br>(94/461)  | 31.8%<br>(55/173)  | 32.2%<br>(120/373) | 26.5%<br>(179/675) | 24.9%<br>(108/433) | 26.2%<br>(155/592) | 26.5%<br>(343/1293)  | <b>26.4%</b><br><b>(1054/3999)</b> |                                            |
| Town or village                       | 21.0%<br>(97/461)  | 16.2%<br>(28/173)  | 22.3%<br>(83/373)  | 23.9%<br>(161/675) | 21.9%<br>(95/433)  | 20.4%<br>(121/592) | 20.0%<br>(258/1293)  | <b>21.1%</b><br><b>(843/3999)</b>  |                                            |
| Farm                                  | 7.4%<br>(37/461)   | 5.8%<br>(10/173)   | 4.8%<br>(18/373)   | 8.7%<br>(59/675)   | 9.2%<br>(40/433)   | 7.9%<br>(47/592)   | 8.4%<br>(108/1293)   | <b>8.0%</b><br><b>(319/3999)</b>   |                                            |
| Reserve                               | 0.2%<br>(1/461)    | 0.6%<br>(1/173)    | 0.5%<br>(2/373)    | 0.3%<br>(2/675)    | 1.4%<br>(6/433)    | 0.5%<br>(3/592)    | 0.4%<br>(5/1293)     | <b>0.5%</b><br><b>(20/3999)</b>    |                                            |
| <b>Ethnicity</b>                      |                    |                    |                    |                    |                    |                    |                      |                                    |                                            |
| White/<br>Caucasian                   | 92.5%<br>(422/456) | 88.4%<br>(153/173) | 88.7%<br>(331/373) | 91.3%<br>(616/675) | 89.8%<br>(389/433) | 90.7%<br>(538/593) | 89.4%<br>(1153/1289) | <b>90.2%</b><br><b>(3602/3992)</b> | $\chi^2_{(1, N = 3992)} = 6.27, p = .01$   |
| Asian                                 | 1.3%<br>(6/456)    | 1.2%<br>(2/173)    | 2.1%<br>(8/373)    | 1.3%<br>(9/675)    | 2.1%<br>(9/433)    | 2.2%<br>(13/593)   | 3.5%<br>(21/593)     | <b>1.4%</b><br><b>(54/3992)</b>    |                                            |
| First Nations/<br>Métis               | 2.6%<br>(12/456)   | 3.5%<br>(6/173)    | 3.5%<br>(13/373)   | 5.3%<br>(36/675)   | 5.5%<br>(24/433)   | 5.2%<br>(31/593)   | 4.5%<br>(58/1289)    | <b>4.5%</b><br><b>(180/3992)</b>   |                                            |
| Other                                 | 3.5%<br>(16/456)   | 6.9%<br>(12/173)   | 5.6%<br>(21/373)   | 2.1%<br>(14/675)   | 2.5%<br>(11/433)   | 1.9%<br>(11/593)   | 4.4%<br>(57/1289)    | <b>3.9%</b><br><b>(155/3992)</b>   |                                            |
| <b>Employment (most applicable)</b>   |                    |                    |                    |                    |                    |                    |                      |                                    |                                            |
| Paid employment                       | 69.2%<br>(319/461) | 65.9%<br>(114/173) | 61.9%<br>(231/373) | 61.5%<br>(415/675) | 62.4%<br>(270/433) | 69.8%<br>(414/593) | 65.7%<br>(850/1293)  | <b>65.3%</b><br><b>(2612/4000)</b> |                                            |
| Student                               | 3.0%<br>(14/461)   | 6.4%<br>(11/173)   | 8.0%<br>(30/373)   | 4.4%<br>(30/675)   | 6.0%<br>(26/433)   | 6.2%<br>(37/593)   | 6.2%<br>(80/1293)    | <b>6.3%</b><br><b>(251/4000)</b>   |                                            |

|                                                   |                    |                    |                    |                    |                    |                    |                     |                                    |                                                   |
|---------------------------------------------------|--------------------|--------------------|--------------------|--------------------|--------------------|--------------------|---------------------|------------------------------------|---------------------------------------------------|
| Unemployed                                        | 9.3%<br>(43/461)   | 5.2%<br>(9/173)    | 8.6%<br>(32/373)   | 6.7%<br>(45/675)   | 8.1%<br>(35/433)   | 6.4%<br>(38/593)   | 7.9%<br>(102/1293)  | <b>7.6%</b><br><b>(304/4000)</b>   | $\chi^2_{(1, N = 4000)}$<br>= 0.81, $p =$<br>.37  |
| Other<br>(retired,<br>home duties,<br>disability) | 18.4%<br>(85/461)  | 22.5%<br>(39/173)  | 21.4%<br>(80/373)  | 27.4%<br>(185/675) | 23.6%<br>(102/433) | 17.5%<br>(104/593) | 20.2%<br>(261/1293) | <b>21.5%</b><br><b>(833/4000)</b>  |                                                   |
| <b>Education</b>                                  |                    |                    |                    |                    |                    |                    |                     |                                    |                                                   |
| University<br>degree                              | 36.4%<br>(168/461) | 33.5%<br>(58/173)  | 31.9%<br>(119/373) | 36.1%<br>(244/675) | 33.9%<br>(147/433) | 32.5%<br>(193/593) | 35.4%<br>(459/1293) | <b>34.7%</b><br><b>(1388/4001)</b> | $\chi^2_{(6, N = 4001)}$<br>= 46.09,<br>$p = .12$ |
| <b>Relationship<br/>Status</b>                    |                    |                    |                    |                    |                    |                    |                     |                                    |                                                   |
| Married                                           | 45.1%<br>(208/461) | 45.3%<br>(78/172)  | 46.2%<br>(169/373) | 44.4%<br>(300/675) | 46.0%<br>(199/433) | 46.5%<br>(271/583) | 46.3%<br>(594/1284) | <b>45.6%</b><br><b>(1819/3992)</b> | $\chi^2_{(6, N = 3992)}$<br>= 28.26<br>$p = .57$  |
| <b>Children</b>                                   |                    |                    |                    |                    |                    |                    |                     |                                    |                                                   |
| (% yes)                                           | 60.1%<br>(276/459) | 59.9%<br>(103/172) | 59.8%<br>(223/373) | 57.6%<br>(389/675) | 57.5%<br>(249/433) | 50.3%<br>(298/592) | 55.4%<br>(712/1284) | <b>56.4%</b><br><b>(2250/3988)</b> | $\chi^2_{(6, N = 3988)}$<br>= 7.91<br>$p = .02$   |

Note. Bonferroni correction  $p$  significant at .006.

Table 2. Baseline symptom severity and current and lifetime mental health service use by trial periods, non-trial period and overall for patients who started the Wellbeing Course

|                                                  | <b>Trial 1<br/>(Nov 2013 -<br/>Jul 2015)</b>                                                                                | <b>Trial 2<br/>(Feb 2016<br/>- Jul 2016)</b>                  | <b>Trial 3<br/>(Dec 2016<br/>- Jun<br/>2017)</b>                                                              | <b>Trial 4<br/>(Oct 2017<br/>- Sep<br/>2018)</b>                   | <b>Trial 5<br/>(Sep 2018 -<br/>Mar 2019)</b>                                                        | <b>Trial 6<br/>(May 2019<br/>- Nov<br/>2019)</b>                                                                 | <b>Non-trial<br/>(individua<br/>ls between<br/>trial<br/>periods)</b> | <b>TOTAL</b>                                  | <b>Significance</b>                                 |
|--------------------------------------------------|-----------------------------------------------------------------------------------------------------------------------------|---------------------------------------------------------------|---------------------------------------------------------------------------------------------------------------|--------------------------------------------------------------------|-----------------------------------------------------------------------------------------------------|------------------------------------------------------------------------------------------------------------------|-----------------------------------------------------------------------|-----------------------------------------------|-----------------------------------------------------|
| Comparison                                       | Cohort<br>Comparison:<br>once-weekly<br>support by<br>specialized<br>therapists<br>vs.<br>non-<br>specialized<br>therapists | RCT:<br>optional<br>support vs.<br>once-<br>weekly<br>support | Preference<br>Trial:<br>patients<br>select<br>preference<br>for<br>optional<br>vs. once-<br>weekly<br>support | RCT:<br>once-<br>weekly vs.<br>one-<br>business-<br>day<br>support | RCT:<br>once-weekly<br>support<br>with/without<br>pre-<br>treatment<br>motivational<br>interviewing | Factorial<br>RCT:<br>once-<br>weekly vs.<br>twice-<br>weekly<br>support<br>&<br>Homework<br>reflection<br>or Not | Standard<br>Practice:<br>once-<br>weekly<br>support                   |                                               |                                                     |
| <b>Baseline symptom scores</b>                   |                                                                                                                             |                                                               |                                                                                                               |                                                                    |                                                                                                     |                                                                                                                  |                                                                       |                                               |                                                     |
| Mean PHQ-9<br>(SD)                               | 12.42<br>(5.62)                                                                                                             | 11.19<br>(6.00)                                               | 12.22<br>(6.14)                                                                                               | 12.09<br>(5.75)                                                    | 11.81<br>(5.79)                                                                                     | 11.90<br>(5.53)                                                                                                  | 12.11<br>(5.76)                                                       | <b>12.05</b><br><b>(5.76)</b>                 | $F_{(6,3996)} = 1.24,$<br>$p = .28$                 |
| Mean GAD-7<br>(SD)                               | 11.66<br>(5.23)                                                                                                             | 10.97<br>(5.09)                                               | 12.02<br>(5.20)                                                                                               | 12.14<br>(5.10)                                                    | 11.46<br>(5.21)                                                                                     | 11.59<br>(4.99)                                                                                                  | 12.06<br>(4.98)                                                       | <b>11.85</b><br><b>(5.09)</b>                 | $F_{(6,3996)} = 2.48,$<br>$p = .02$                 |
| Mean K10 (SD)                                    | 27.39<br>(7.27)                                                                                                             | 26.70<br>(6.88)                                               | 28.03<br>(8.25)                                                                                               | 28.29<br>(7.52)                                                    | 27.67<br>(7.81)                                                                                     | 27.59<br>(7.49)                                                                                                  | 28.02<br>(7.46)                                                       | <b>27.84</b><br><b>(7.55)</b>                 | $F_{(6, 3996)} = 1.65,$<br>$p = .13$                |
| Mean SDS (SD)                                    | 17.66<br>(7.88)                                                                                                             | 16.77<br>(7.48)                                               | 16.91<br>(7.92)                                                                                               | 16.91<br>(7.78)                                                    | 17.04<br>(8.37)                                                                                     | 16.69<br>(7.76)                                                                                                  | 17.25<br>(7.64)                                                       | <b>17.09</b><br><b>(7.81)</b>                 | $F_{(6, 3996)} = 0.89,$<br>$p = .50$                |
| Mean PDSS-SR<br>(SD)                             | 7.54 (6.51)                                                                                                                 | 7.00<br>(5.69)                                                | 7.23<br>(6.17)                                                                                                | 7.56<br>(5.81)                                                     | 7.51 (6.10)                                                                                         | 6.69<br>(5.82)                                                                                                   | 7.59<br>(6.02)                                                        | <b>7.38 (6.03)</b>                            | $F_{(6,3996)} = 1.88,$<br>$p = .08$                 |
| Mean SPS/SIAS-<br>6 (SD)                         | 13.2<br>(10.18)                                                                                                             | 14.7<br>(10.0)                                                | 14.8<br>(11.33)                                                                                               | 14.9<br>(11.1)                                                     | 15.3 (11.2)                                                                                         | 14.6<br>(10.5)                                                                                                   | 16.0<br>(10.6)                                                        | <b>14.71</b><br><b>(10.73)</b>                | $F_{(6,3996)} = 2.04,$<br>$p = .06$                 |
| <b>Symptoms in the clinical range</b>            |                                                                                                                             |                                                               |                                                                                                               |                                                                    |                                                                                                     |                                                                                                                  |                                                                       |                                               |                                                     |
| PHQ-9 and or<br>GAD-7 in clinical<br>range       | 88.5%<br>(409/462)                                                                                                          | 81.5%<br>(141/173)                                            | 85.5%<br>(319/373)                                                                                            | 88.9%<br>(600/675)                                                 | 86.4%<br>(374/433)                                                                                  | 86.1%<br>(511/593)                                                                                               | 89.0%<br>(1153/12<br>94)                                              | <b>83.7%</b><br><b>(3352/4003</b><br><b>)</b> | $\chi^2_{(6, N = 4003)} =$<br>13.21<br>$p = .04$    |
| <b>Mental health service use (last 3 months)</b> |                                                                                                                             |                                                               |                                                                                                               |                                                                    |                                                                                                     |                                                                                                                  |                                                                       |                                               |                                                     |
| Receiving other<br>mental health<br>treatment    | 48.7%<br>(222/456)                                                                                                          | 39.3%<br>(68/173)                                             | 37.6%<br>(140/372)                                                                                            | 49.2%<br>(332/675)                                                 | 47.1%<br>(204/433)                                                                                  | 49.7%<br>(295/593)                                                                                               | 46.2%<br>(598/129<br>3)                                               | <b>46.5%</b><br><b>(1858/3994</b><br><b>)</b> | $\chi^2_{(6, N = 3995)}$<br>$= 20.79$<br>$p = .002$ |
| On wait-list for<br>other services               | --                                                                                                                          | 9.2%<br>(16/173)                                              | 11.3%<br>(42/372)                                                                                             | 13.2%<br>(89/675)                                                  | 10.2%<br>(44/433)                                                                                   | 11.0%<br>(65/593)                                                                                                | 12.8%<br>(158/123<br>2)                                               | <b>11.9%</b><br><b>(414/3478)</b>             | $\chi^2_{(6, N = 3532)}$<br>$= 5.24$<br>$p = .51$   |

|                                             |                    |                    |                    |                    |                    |                    |                     |                                    |                                                  |
|---------------------------------------------|--------------------|--------------------|--------------------|--------------------|--------------------|--------------------|---------------------|------------------------------------|--------------------------------------------------|
| Psychotropic medication                     | 58.6%<br>(270/461) | 59.5%<br>(103/173) | 54.3%<br>(202/372) | 60.6%<br>(372/614) | 65.0%<br>(253/389) | 64.1%<br>(337/526) | 60.7%<br>(753/1240) | <b>60.7%</b><br><b>(2290/3775)</b> | $\chi^2_{(6, N = 3775)}$<br>= 12.77<br>$p = .05$ |
| <b>Mental health service use (lifetime)</b> |                    |                    |                    |                    |                    |                    |                     |                                    |                                                  |
| Family doctor/walk-in clinic                | --                 | --                 | --                 | 85.6%<br>(578/675) | 84.1%<br>(364/433) | 86.5%<br>(513/593) | 88.6%<br>(380/429)  | <b>86.1%</b><br><b>(1834/2130)</b> | $\chi^2_{(3, N = 2130)}$<br>= 3.92<br>$p = .27$  |
| Psychiatrist                                | --                 | --                 | --                 | 31.7%<br>(214/675) | 28.9%<br>(125/433) | 31.2%<br>(185/593) | 35.0%<br>(150/429)  | <b>31.61%</b><br><b>(673/2129)</b> | $\chi^2_{(3, N = 2129)}$<br>= 3.79<br>$p = .29$  |

*Note.* PHQ-9 = Patient Health Questionnaire 9-item; GAD-7 = Generalized Anxiety Disorder Questionnaire 7-item; K10 = Kessler Distress Scale; SDS = Sheehan Disability Scale; PDSS-SR = Panic Disorder Severity Scale Self-Report; SIAS-6/SPS-6 = Social Interaction Anxiety Scale and Social Phobia Scale (SIAS-6/SPS-6). Bonferroni correction  $p$  significant at .004.

Table 3. Reliable change, program engagement, working alliance and treatment ratings by trial periods, non-trial period and overall

|                                    | <b>Trial 1<br/>(Nov 2013 -<br/>Jul 2015)</b>                                                                                | <b>Trial 2<br/>(Feb 2016<br/>- Jul 2016)</b>                  | <b>Trial 3<br/>(Dec 2016 -<br/>Jun 2017)</b>                                                               | <b>Trial 4<br/>(Oct 2017 -<br/>Sep 2018)</b>                  | <b>Trial 5<br/>(Sep 2018 -<br/>Mar 2019)</b>                                                        | <b>Trial 6<br/>(May 2019<br/>- Nov<br/>2019)</b>                                                                 | <b>Non-trial</b>                                | <b>TOTAL</b>                       | <b>Significance</b>                       |
|------------------------------------|-----------------------------------------------------------------------------------------------------------------------------|---------------------------------------------------------------|------------------------------------------------------------------------------------------------------------|---------------------------------------------------------------|-----------------------------------------------------------------------------------------------------|------------------------------------------------------------------------------------------------------------------|-------------------------------------------------|------------------------------------|-------------------------------------------|
| Comparison                         | Cohort<br>Comparison:<br>once-weekly<br>support by<br>specialized<br>therapists<br>vs.<br>non-<br>specialized<br>therapists | RCT:<br>optional<br>support vs.<br>once-<br>weekly<br>support | Preference<br>Trial:<br>patients<br>select<br>preference<br>for optional<br>vs. once-<br>weekly<br>support | RCT:<br>once-weekly<br>vs.<br>one-<br>business-day<br>support | RCT:<br>once-weekly<br>support<br>with/without<br>pre-<br>treatment<br>motivational<br>interviewing | Factorial<br>RCT:<br>once-<br>weekly vs.<br>twice-<br>weekly<br>support<br>&<br>Homework<br>reflection<br>or Not | Standard<br>Practice:<br>once-weekly<br>support |                                    |                                           |
| <b>Reliable Change</b>             |                                                                                                                             |                                                               |                                                                                                            |                                                               |                                                                                                     |                                                                                                                  |                                                 |                                    |                                           |
| PHQ-9 post-treatment recovery      | 40.1%                                                                                                                       | 32.7%                                                         | 35.4%                                                                                                      | 35.4%                                                         | 34.5%                                                                                               | 35.9%                                                                                                            | 36.8%                                           | <b>36.3%</b>                       | $F_{(6, 2650)} = 0.70, p = .65$           |
| PHQ-9 post-treatment deterioration | 1.4%                                                                                                                        | 1.4%                                                          | 1.5%                                                                                                       | 2.2%                                                          | 1.3%                                                                                                | 1.4%                                                                                                             | 1.7%                                            | <b>1.7%</b>                        | $F_{(6, 1308)} = 0.22, p = .97$           |
| GAD-7 post-treatment recovery      | 43.2%                                                                                                                       | 44.2%                                                         | 45.5%                                                                                                      | 46.2%                                                         | 43.7%                                                                                               | 44.6%                                                                                                            | 45.3%                                           | <b>45.0%</b>                       | $F_{(6, 2333)} = 1.09, p = .37$           |
| GAD-7 post-treatment deterioration | 1.9%                                                                                                                        | 1.4%                                                          | 1.3%                                                                                                       | 1.8%                                                          | 1.6%                                                                                                | 2.1%                                                                                                             | 2.4%                                            | <b>2.0%</b>                        | $F_{(6, 920)} = 0.30, p = .94$            |
| <b>Program Engagement</b>          |                                                                                                                             |                                                               |                                                                                                            |                                                               |                                                                                                     |                                                                                                                  |                                                 |                                    |                                           |
| Accessed $\geq 4$ lessons          | 83.8%<br>(387/462)                                                                                                          | 78.0%<br>(135/173)                                            | 79.6%<br>(297/373)                                                                                         | 81.2%<br>(548/675)                                            | 82.7%<br>(358/433)                                                                                  | 81.1%<br>(481/593)                                                                                               | 78.1%<br>(1011/ 1294)                           | <b>80.4%</b><br><b>(3217/4003)</b> | $\chi^2_{(6, N = 4003)} = 10.18, p = .12$ |
| Accessed 5 lessons                 | 75.1%<br>(347/462)                                                                                                          | 69.9%<br>(121/173)                                            | 67.8%<br>(253/373)                                                                                         | 70.5%<br>(476/675)                                            | 70.0%<br>(303/433)                                                                                  | 73.7%<br>(437/593)                                                                                               | 69.1%<br>(894/1294)                             | <b>70.7%</b><br><b>(2831/4003)</b> | $\chi^2_{(6, N = 4003)} = 10.18, p = .12$ |
| Mean number                        | 9.08                                                                                                                        | 5.86                                                          | 7.65                                                                                                       | 10.40                                                         | 8.78(1.50)                                                                                          | 12.83                                                                                                            | 8.69                                            | <b>9.43</b>                        | $F_{(6, 3996)} =$                         |

|                                                               |                    |                    |                    |                    |                    |                    |                    |                                    |                                              |
|---------------------------------------------------------------|--------------------|--------------------|--------------------|--------------------|--------------------|--------------------|--------------------|------------------------------------|----------------------------------------------|
| of therapist emails to patient ( <i>SD</i> )                  | (2.39)             | (2.83)             | (2.73)             | (3.41)             |                    | (4.17)             | (3.03)             | <b>(3.52)</b>                      | 208.26, $p < .001^a$                         |
| Mean number of emails from patient to therapist ( <i>SD</i> ) | 4.73<br>(3.94)     | 2.88<br>(3.09)     | 3.42<br>(3.04)     | 4.29<br>(4.00)     | 3.47<br>(2.83)     | 4.70<br>(3.97)     | 3.67<br>(3.39)     | <b>3.97</b><br><b>(3.60)</b>       | $F_{(6, 3996)} = 15.59, p < .001^b$          |
| Mean number of phone calls ( <i>SD</i> )                      | 0.88<br>(1.32)     | 0.54<br>(0.84)     | 0.62<br>(1.03)     | 0.91<br>(1.32)     | 0.93<br>(1.22)     | 0.95<br>(1.17)     | 0.80<br>(1.14)     | <b>0.84</b><br><b>(1.19)</b>       | $F_{(6, 3996)} = 18.00, p < .001^c$          |
| <b>Working alliance</b>                                       |                    |                    |                    |                    |                    |                    |                    |                                    |                                              |
| WAI-SR total score                                            | --                 | 42.63<br>(11.86)   | 45.16<br>(11.18)   | 46.19<br>(10.58)   | 47.30<br>(9.65)    | 47.55<br>(10.10)   | 45.61<br>(10.94)   | <b>46.19</b><br><b>(10.62)</b>     | $F_{(3, 1973)} = 5.24, p < .001^d$           |
| WAI-SR bond score                                             | --                 | 15.56<br>(4.89)    | 16.30<br>(4.10)    | 16.91<br>(3.82)    | 17.11<br>(3.22)    | 17.29<br>(3.56)    | 16.58<br>(3.97)    | <b>16.80</b><br><b>(3.84)</b>      | $F_{(3, 1966)} = 5.14, p < .001^e$           |
| WAI-SR task score                                             | --                 | 14.37<br>(3.65)    | 15.32<br>(3.37)    | 14.95<br>(3.61)    | 15.51<br>(3.39)    | 15.41<br>(3.43)    | 14.89<br>(3.67)    | <b>15.11</b><br><b>(3.55)</b>      | $F_{(3, 1966)} = 3.06, p = .009$             |
| WAI-SR goal score                                             | --                 | 12.70<br>(4.93)    | 13.54<br>(5.22)    | 14.33<br>(4.58)    | 14.66<br>(4.38)    | 14.86<br>(4.39)    | 14.04<br>(4.83)    | <b>14.25</b><br><b>(4.68)</b>      | $F_{(63, 1966)} = 5.47, p < .001^f$          |
| <b>Treatment ratings</b>                                      |                    |                    |                    |                    |                    |                    |                    |                                    |                                              |
| Satisfied/very satisfied overall                              | 85.1%<br>(280/329) | 78.4%<br>(91/116)  | 89.7%<br>(227/253) | 86.3%<br>(417/483) | 85.9%<br>(243/283) | 89.3%<br>(342/383) | 82.3%<br>(677/823) | <b>85.2%</b><br><b>(2277/2674)</b> | $\chi^2_{(6, N = 2674)} = 19.69, p = .003$   |
| Satisfied/very satisfied with materials                       | 91.2%<br>(300/329) | 85.3%<br>(99/116)  | 92.5%<br>(234/253) | 89.5%<br>(437/488) | 89.0%<br>(252/283) | 91.4%<br>(349/382) | 88.5%<br>(728/823) | <b>89.7%</b><br><b>(2399/2674)</b> | $\chi^2_{(6, N = 2674)} = 7.97, p = .24$     |
| Satisfied/very satisfied with telephone calls                 | 87.1%<br>(277/318) | 88.8%<br>(103/116) | 83.0%<br>(210/253) | 83.8%<br>(409/488) | 87.6%<br>(248/283) | 84.0%<br>(321/382) | 83.1%<br>(683/822) | <b>73.2%</b><br><b>(1125/1536)</b> | $\chi^2_{(6, N = 1536)} = 7.34, p = .29$     |
| Satisfied/very satisfied with emails                          | 82.7%<br>(263/318) | 72.4%<br>(84/116)  | 77.1%<br>(195/253) | 82.4%<br>(402/488) | 86.2%<br>(244/283) | 87.4%<br>(334/382) | 76.4%<br>(628/822) | <b>80.7%</b><br><b>(2150/2662)</b> | $\chi^2_{(6, N = 2622)} = 35.46, p < .001^g$ |
| Increased/greatly increased confidence                        | 90.6%<br>(298/329) | 88.8%<br>(103/116) | 93.7%<br>(237/253) | 90.0%<br>(439/488) | 93.6%<br>(265/283) | 94.5%<br>(361/382) | 88.7%<br>(730/823) | <b>91.0%</b><br><b>(2433/2674)</b> | $\chi^2_{(6, N = 2674)} = 17.04, p = .01$    |
| Increased/greatl                                              | 78.7%              | 77.6%              | 82.6%              | 83.0%              | 84.5%              | 84.3%              | 78.4%              | <b>81.1%</b>                       | $\chi^2_{(6, N = 2674)}$                     |

|                                            |                    |                    |                    |                    |                    |                    |                    |                                    |                                                      |
|--------------------------------------------|--------------------|--------------------|--------------------|--------------------|--------------------|--------------------|--------------------|------------------------------------|------------------------------------------------------|
| y increased motivation for other treatment | (259/329)          | (90/116)           | (209/253)          | (405/488)          | (239/283)          | (322/382)          | (645/823)          | <b>(2169/2674)</b>                 | = 12.28<br><i>p</i> = .06                            |
| Course was worth the time (%)              | 97.3%<br>(320/329) | 97.4%<br>(113/116) | 97.2%<br>(246/253) | 95.5%<br>(466/488) | 97.5%<br>(276/283) | 97.1%<br>(372/382) | 95.0%<br>(782/823) | <b>96.3%</b><br><b>(2575/2674)</b> | $\chi^2_{(6, N = 2674)}$<br>= 9.02<br><i>p</i> = .17 |
| Would recommend course to a friend (%)     | 96.0%<br>(316/329) | 95.7%<br>(111/116) | 97.6%<br>(247/253) | 97.5%<br>(476/488) | 97.2%<br>(275/283) | 97.4%<br>(372/382) | 95.4%<br>(785/823) | <b>96.6%</b><br><b>(2582/2674)</b> | $\chi^2_{(6, N = 2674)}$<br>= 7.34<br><i>p</i> = .29 |

Note. PHQ-9 = Patient Health Questionnaire-9-item; GAD-7 = Generalized Anxiety Disorder-7-item; WAI-SR = Working Alliance Inventory - Short Revised. Bonferroni correction *p* significant at .002.

<sup>a</sup>The mean number of emails therapists sent to patients in Trial 1 (once-weekly), Trial 5 (once-weekly with or without motivational interviewing), and to Non-trial patients (once-weekly) were not significantly different. All other differences in means were significant at *p* < .001.

<sup>b</sup> Patients in Trial 1 (once-weekly), Trial 4 (once-weekly vs. one-business-day), and Trial 6 (once- vs. twice-weekly) sent more emails to therapists than patients in Trial 2 (optional vs. once-weekly), Trial 3 (preference for optional vs. once-weekly), Trial 5 (once-weekly with or without motivational interviewing), and Non-trial patients (once-weekly).

<sup>c</sup> Patients in Trials 2 (optional vs. once-weekly) and Trial 3 (preference for optional vs. once-weekly) had fewer phone conversations than patients in Trials 4 (once-weekly vs. one-business-day), 5 (once-weekly with or without motivational interviewing), and 6 (once- vs. twice-weekly).

<sup>d</sup> Patients in Trial 2 (optional vs once-weekly support) had lower total scores on the WAI-SR than patients in Trial 5 (once-weekly with or without motivational interviewing) and Trial 6 (once-weekly vs. twice-weekly support).

<sup>e</sup> Patients in Trial 2 (optional vs. once-weekly) had lower scores on the WAI-SR Bond scale than patients in Trial 6 (once- vs. twice-weekly).

<sup>f</sup> Patients in Trial 2 (optional vs. once-weekly) had lower scores on the WAI-SR Goal scale than patients in Trial 5 (once-weekly with or without motivational interviewing ) and Trial 6 (once- vs. twice-weekly).

<sup>g</sup> Patients in Trial 6 (once- vs. twice-weekly) had higher email satisfaction scores than patients in Trial 2 (optional vs. once-weekly), Trial 3 (preference for optional or once-weekly), or Non-trial patients (once-weekly) and patients in Trial 5 (once-weekly with or without motivational interviewing) had higher satisfaction rates than Non-trial patients (once-weekly).
